# Supplementary material
Source: publisher figshare collection journal article supplement (https://tandf.figshare.com/ndownloader/files/17505209)
Supplement: Supplementary file 1 [file 17505209]

# Appendix A

**Background and demography**

| **Questions** | **Answer options** | | |
| --- | --- | --- | --- |
| Sex | Man | Woman |  |
| Age |  | Years |  |
| Total number of laparoscopic procedures | < 100 | 100 – 1000 | > 1000 |
| Total number of procedures where you have assisted or seen laparoscopic suturing | 0 | >1 |  |
| Total number of procedures where you have performed laparoscopic suturing | 0 | 1 – 10 | >10 |
| Previous practiced in a virtual reality simulator? | Yes | No |  |
| Number of hours per week you play video- or computer games | 0 | >1 |  |
| Dominant hand | Left | Right |  |
| Do you perceive 3D in cinemas? | Yes | No | Don’t know |

**Graphical interface**

| **Questions on graphics** | **Completely unrealistic** | **Minimally realistic** | **Less realistic** | **Moderately realistic** | **Completely realistic** |
| --- | --- | --- | --- | --- | --- |
| How would you rate the realism of the visceral anatomy? |  |  |  |  |  |
| How realistic would you rate the instruments? |  |  |  |  |  |
| How realistic would you rate the needle? |  |  |  |  |  |
| How realistic would you rate the thread? |  |  |  |  |  |
| How realistic would you rate the suturing exercise? |  |  |  |  |  |

**Haptic feedback**

| **Questions on sense of touch/haptic feedback** | **Completely unrealistic** | **Reminding partly of reality** | **Completely realistic** |
| --- | --- | --- | --- |
| How would you rate the feeling of managing the needle in comparison to reality? |  |  |  |
| How would you rate the feeling of pushing the needle through the tissue in comparison to reality? |  |  |  |
| How did you experience the feeling of tying a knot in comparison to reality? |  |  |  |

**VR experience and recommendation**

| **Questions** | **Answer options** | | |
| --- | --- | --- | --- |
| Did you experience nausea or dizziness during the trials? | Yes | No |  |
| Was it uncomfortable to wear the 3D glasses during the trials? | Yes | No |  |
| Which setting is best suited for novices for laparoscopic suturing? | First | Second | Equally good |
